# Supplementary material for: High Fat Diet‐Induced Skeletal Muscle Wasting Is Decreased by Mesenchymal Stem Cells Administration: Implications on Oxidative Stress, Ubiquitin Proteasome Pathway Activation, and Myonuclear Apoptosis
Source: Hindawi journal article supplement (doi:10.1155/2016/9047821), 2016-01-01
Supplement: f1 [file 9047821.f1.pdf]

Table S1

|                             | 30 weeks Control | 30 weeks HFD | 38 weeks HFD    |             |
|-----------------------------|------------------|--------------|-----------------|-------------|
|                             | untreated        | untreated    | Vehicle-treated | MSC-treated |
| Body weight (g)             | 27.2 ± 4.6       | 46.7 ± 3.5*  | 52 ± 2.8*       | 50.8 ± 3*   |
| Plasma insulin (µg/l)       | 0.6 ± 0.1        | 4.3 ± 2.4*   | 8.2 ± 2.8*      | 6.9 ± 2.5*  |
| Blood glucose (mg/dl)       | 121 ± 22         | 171 ± 13*    | 185 ± 18*       | 177 ± 12*   |
| Serum cholesterol (mg/dl)   | 80 ± 15          | 222 ± 20*    | 230 ± 39*       | 225 ± 21*   |
| Serum triglycerides (mg/dl) | 74 ± 18          | 105 ± 24*    | 112 ± 22*       | 110 ± 18*   |

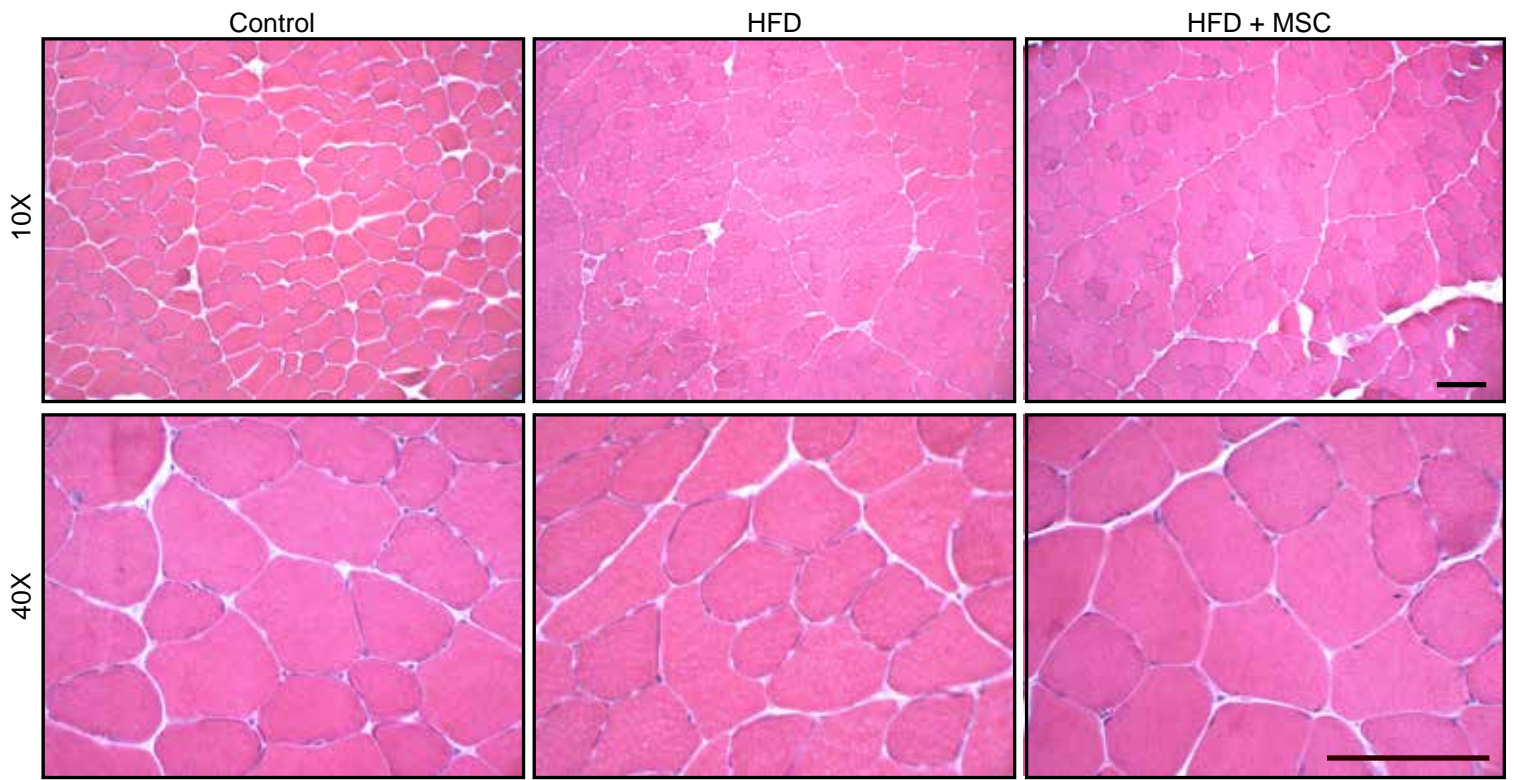

**Fig. S1**

**A**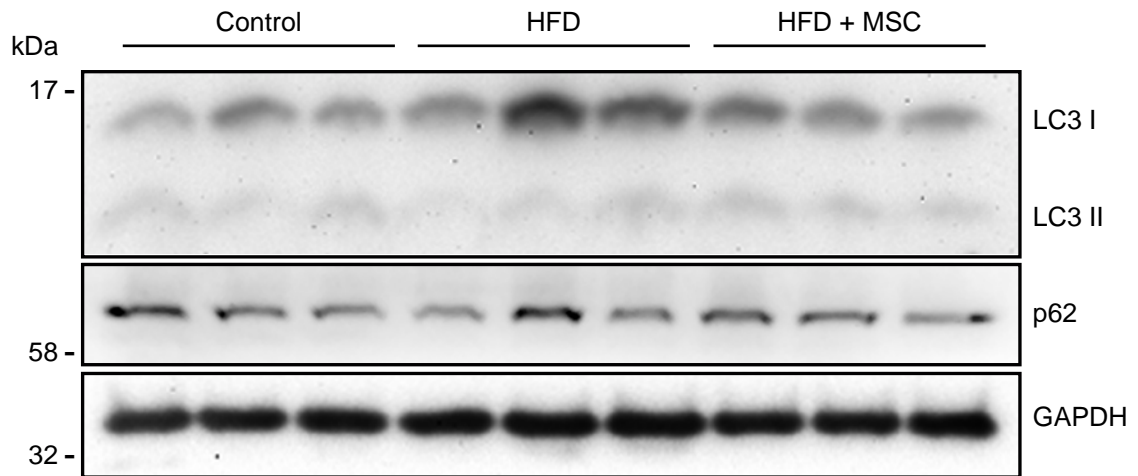**B**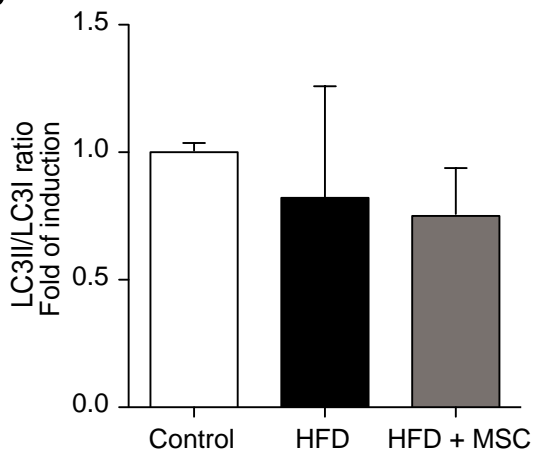**C**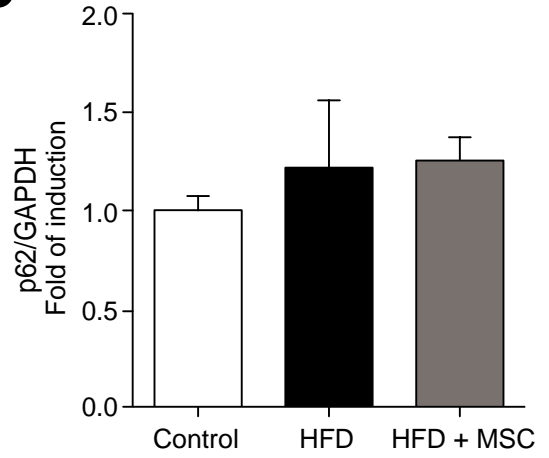**Fig. S2**
